# Supplementary material
Source: MDPI journal article supplement (https://www.mdpi.com/2073-4352/14/5/457)
Supplement: s1 [file s1]

## Supplementary materials

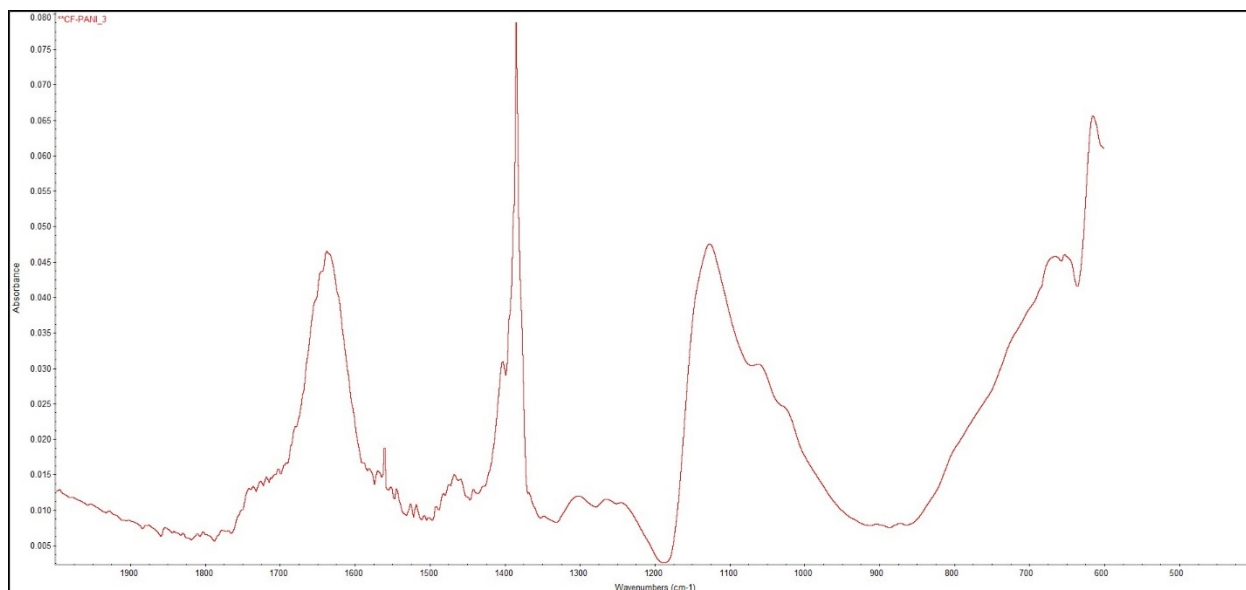

**Figure S1.** FTIR spectrum of BP-0.250 CC-PANI composite.

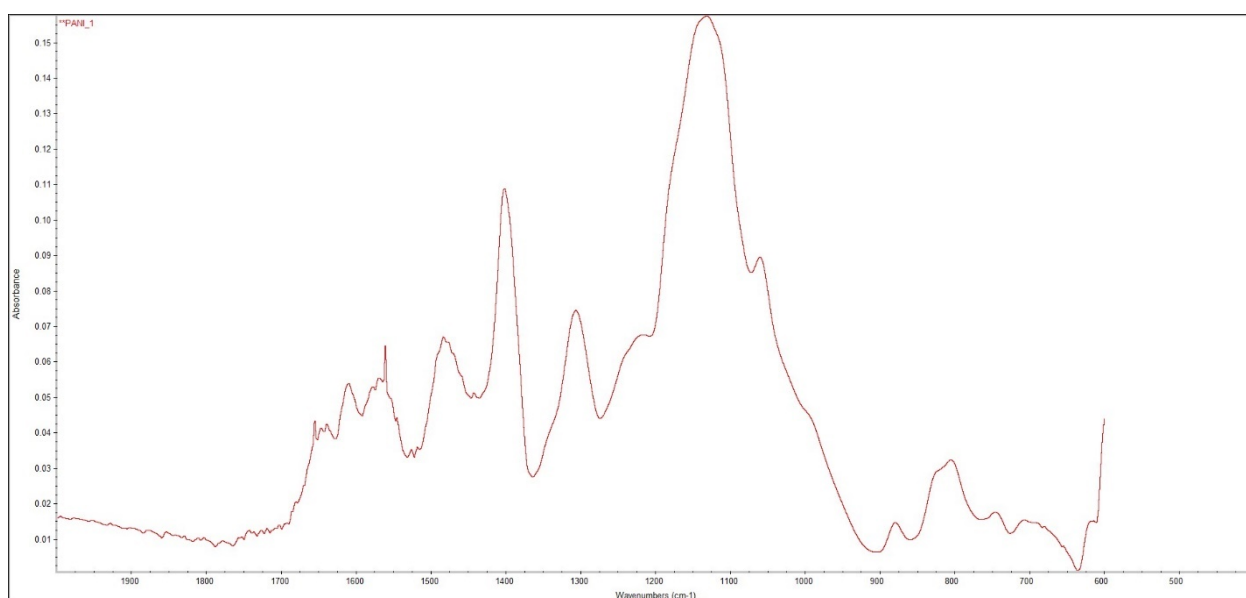

**Figure S2.** FTIR spectrum of PANI (salt form) obtained by the oxidation of aniline by ammonium persulfate in sulfuric acid medium.

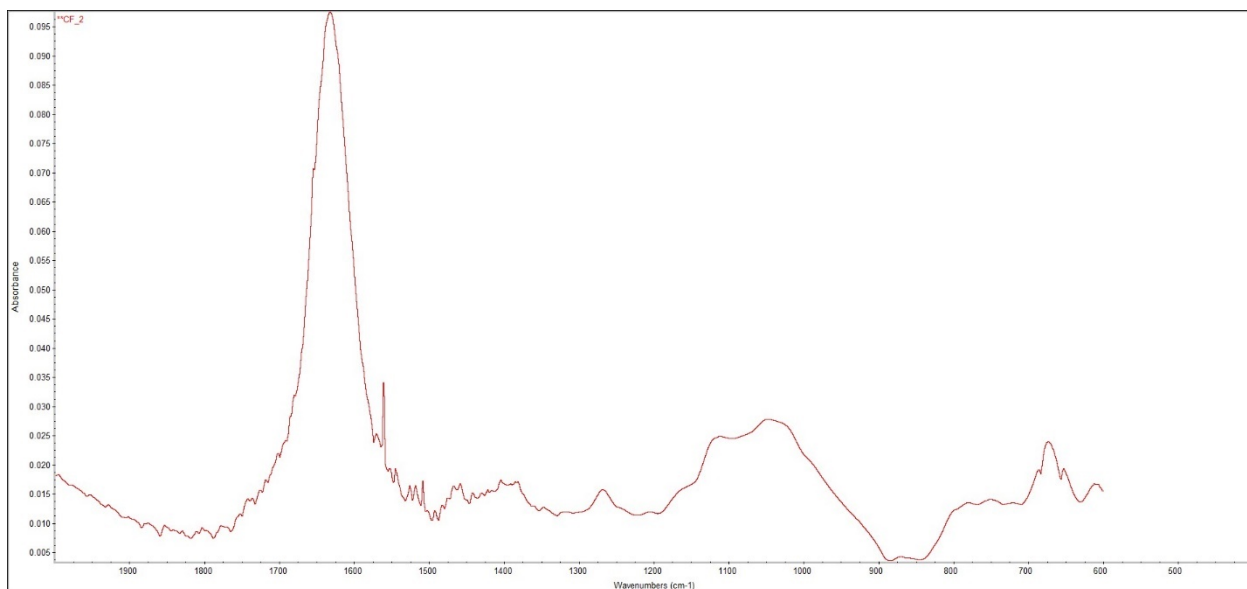

**Figure S3.** FTIR spectrum of CC Busofit T-1-055.

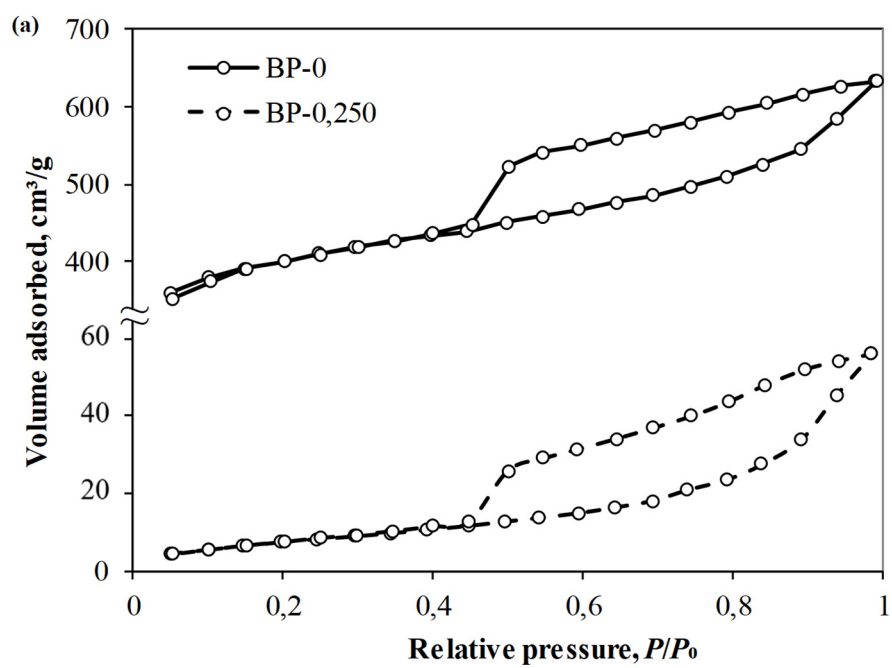

**Figure S4a.** Adsorption/desorption isotherms for BP-0 and BP-0.250.

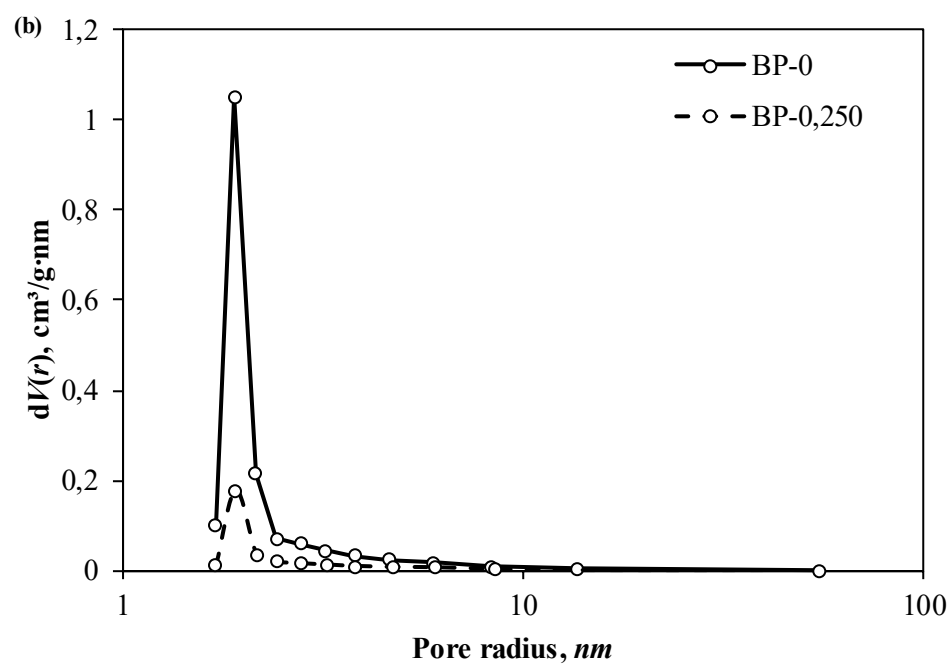

**Figure S4b.** Pore size distribution plots for BP-0 and BP-0.250.

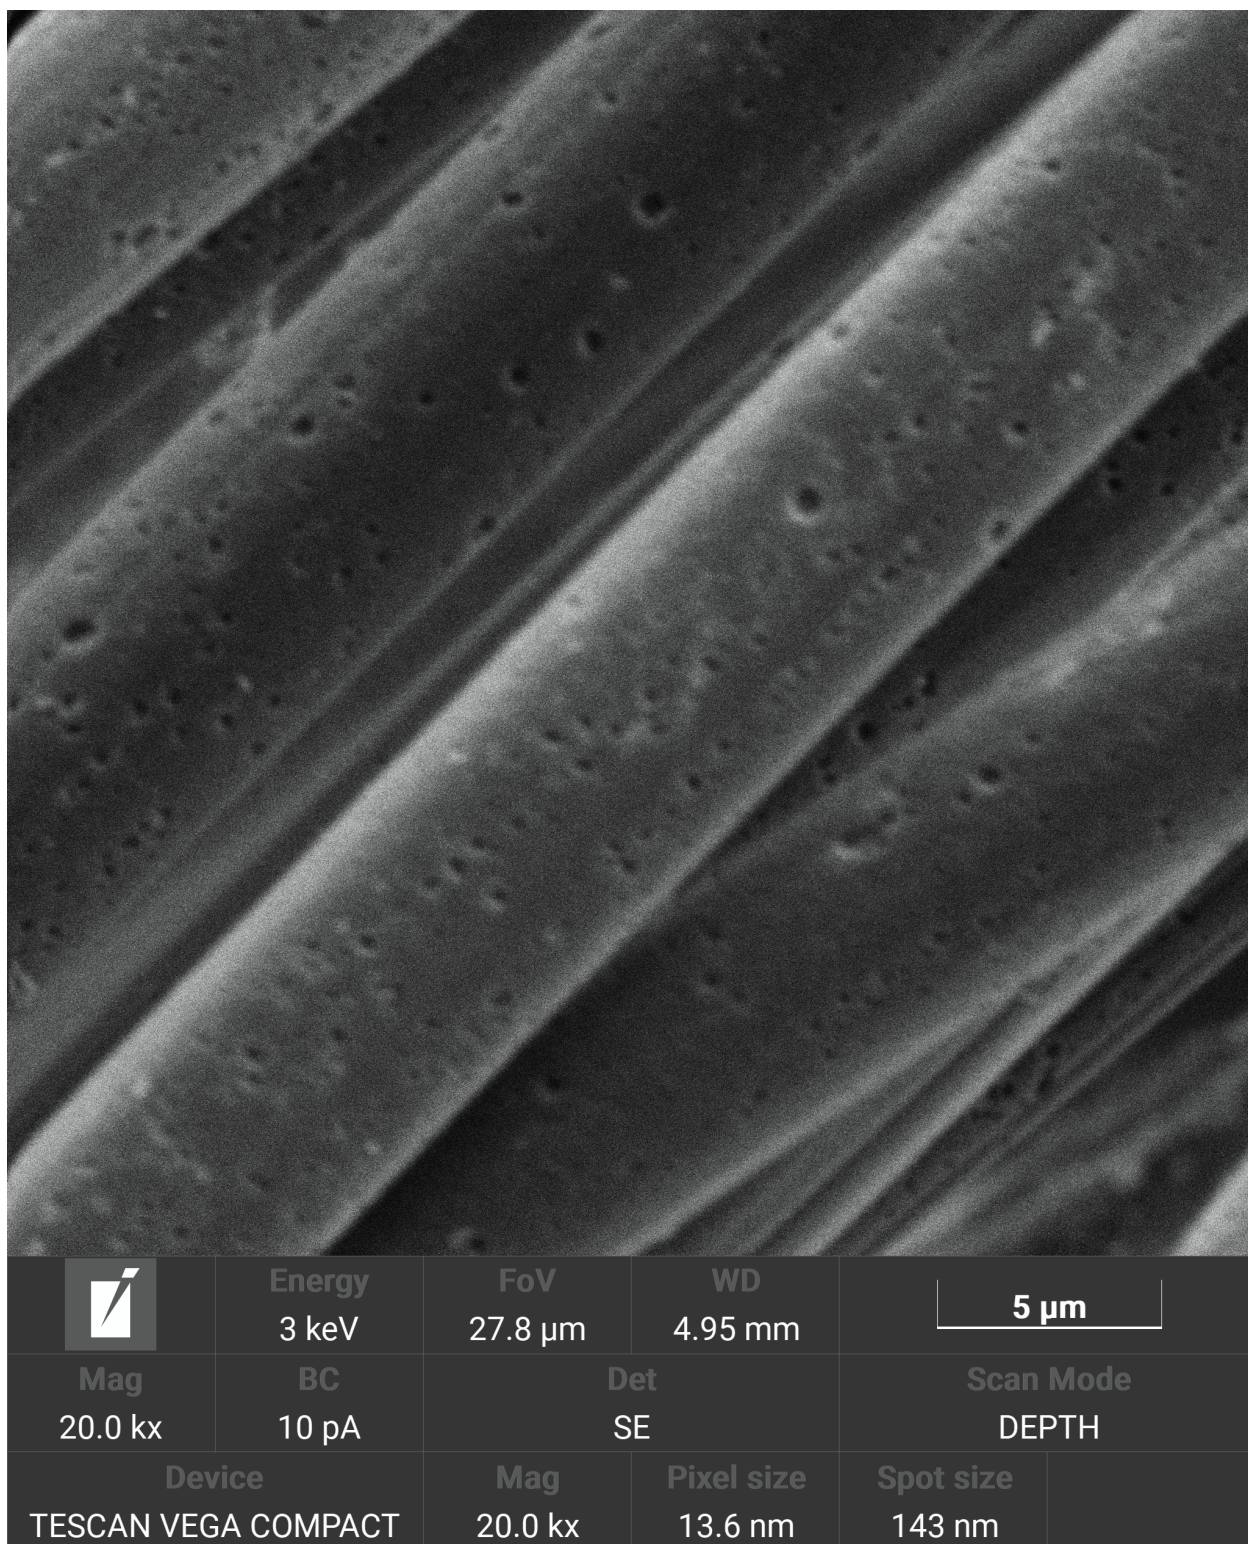

**Figure S5.** Original, uncropped, and unadjusted image of unmodified CC fibers obtained by scanning electron microscopy (Figure 1 in the main text).



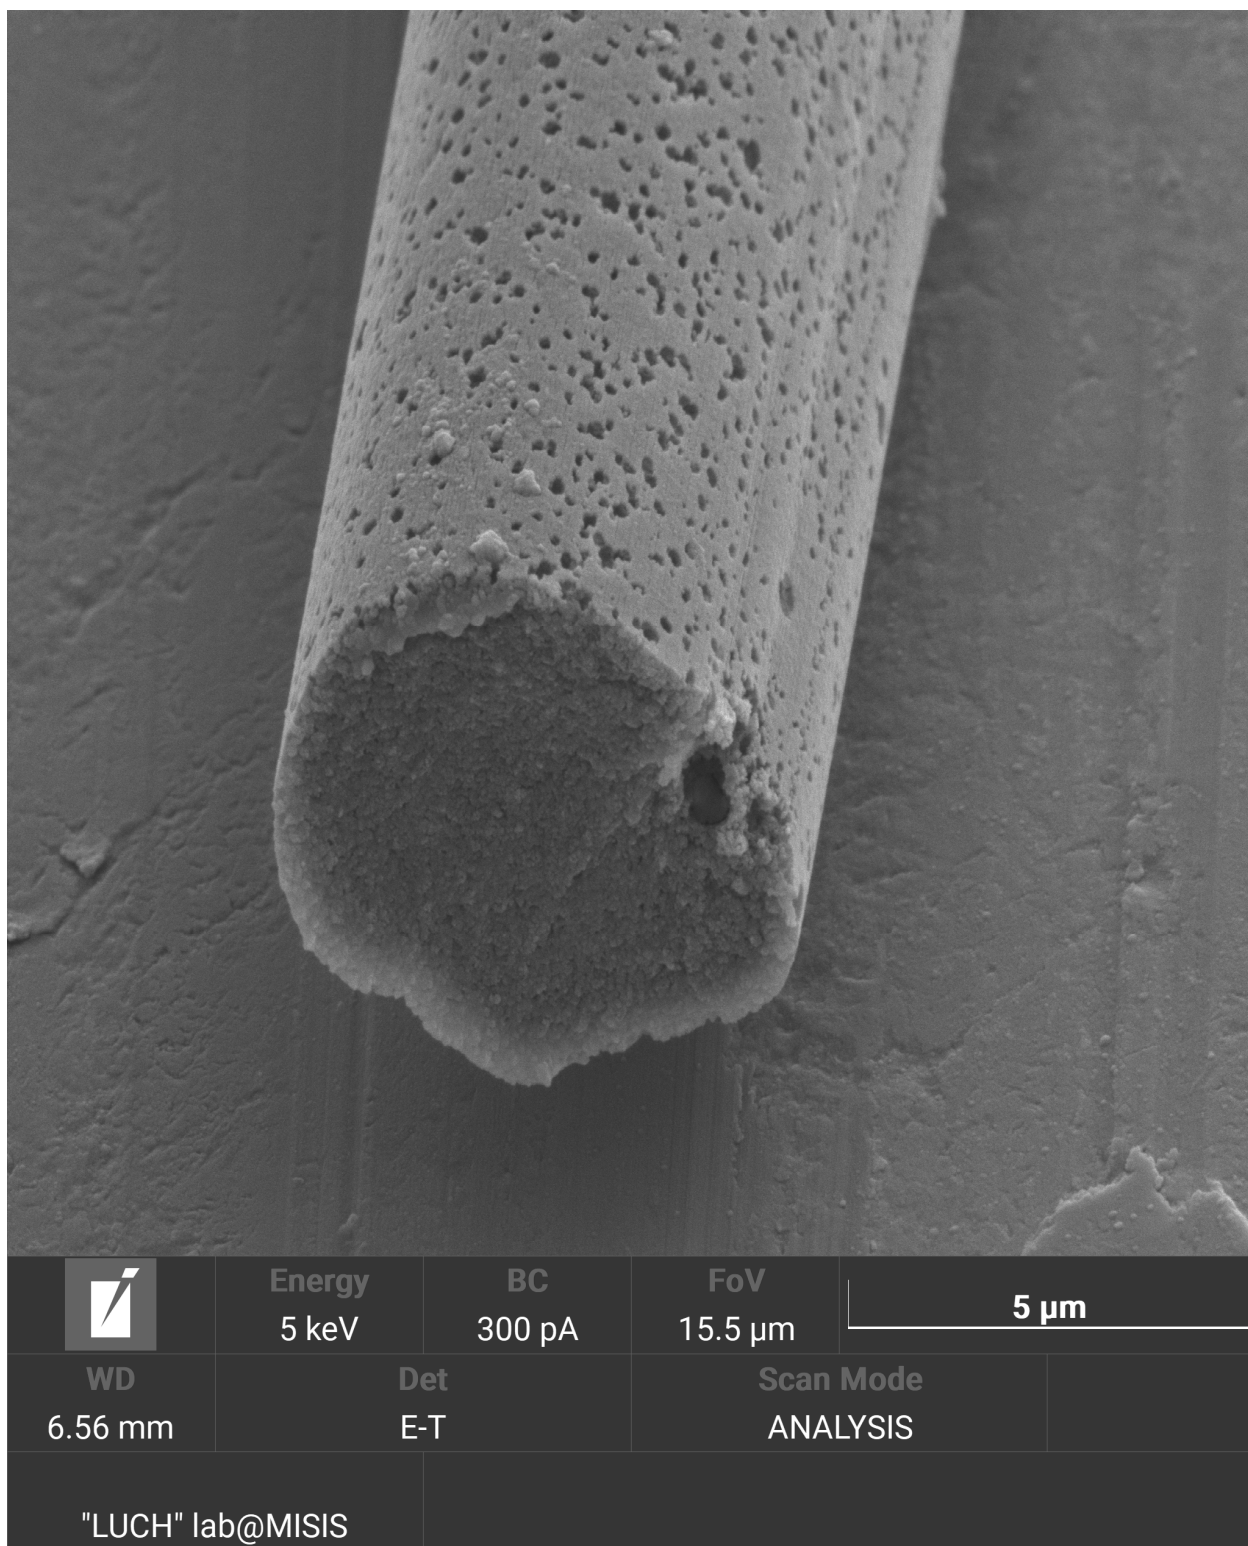

**Figure S6a.** Original, uncropped, and unadjusted image of BP-0 sample obtained by dual-beam scanning electron microscopy (Figure 2a in the main text).

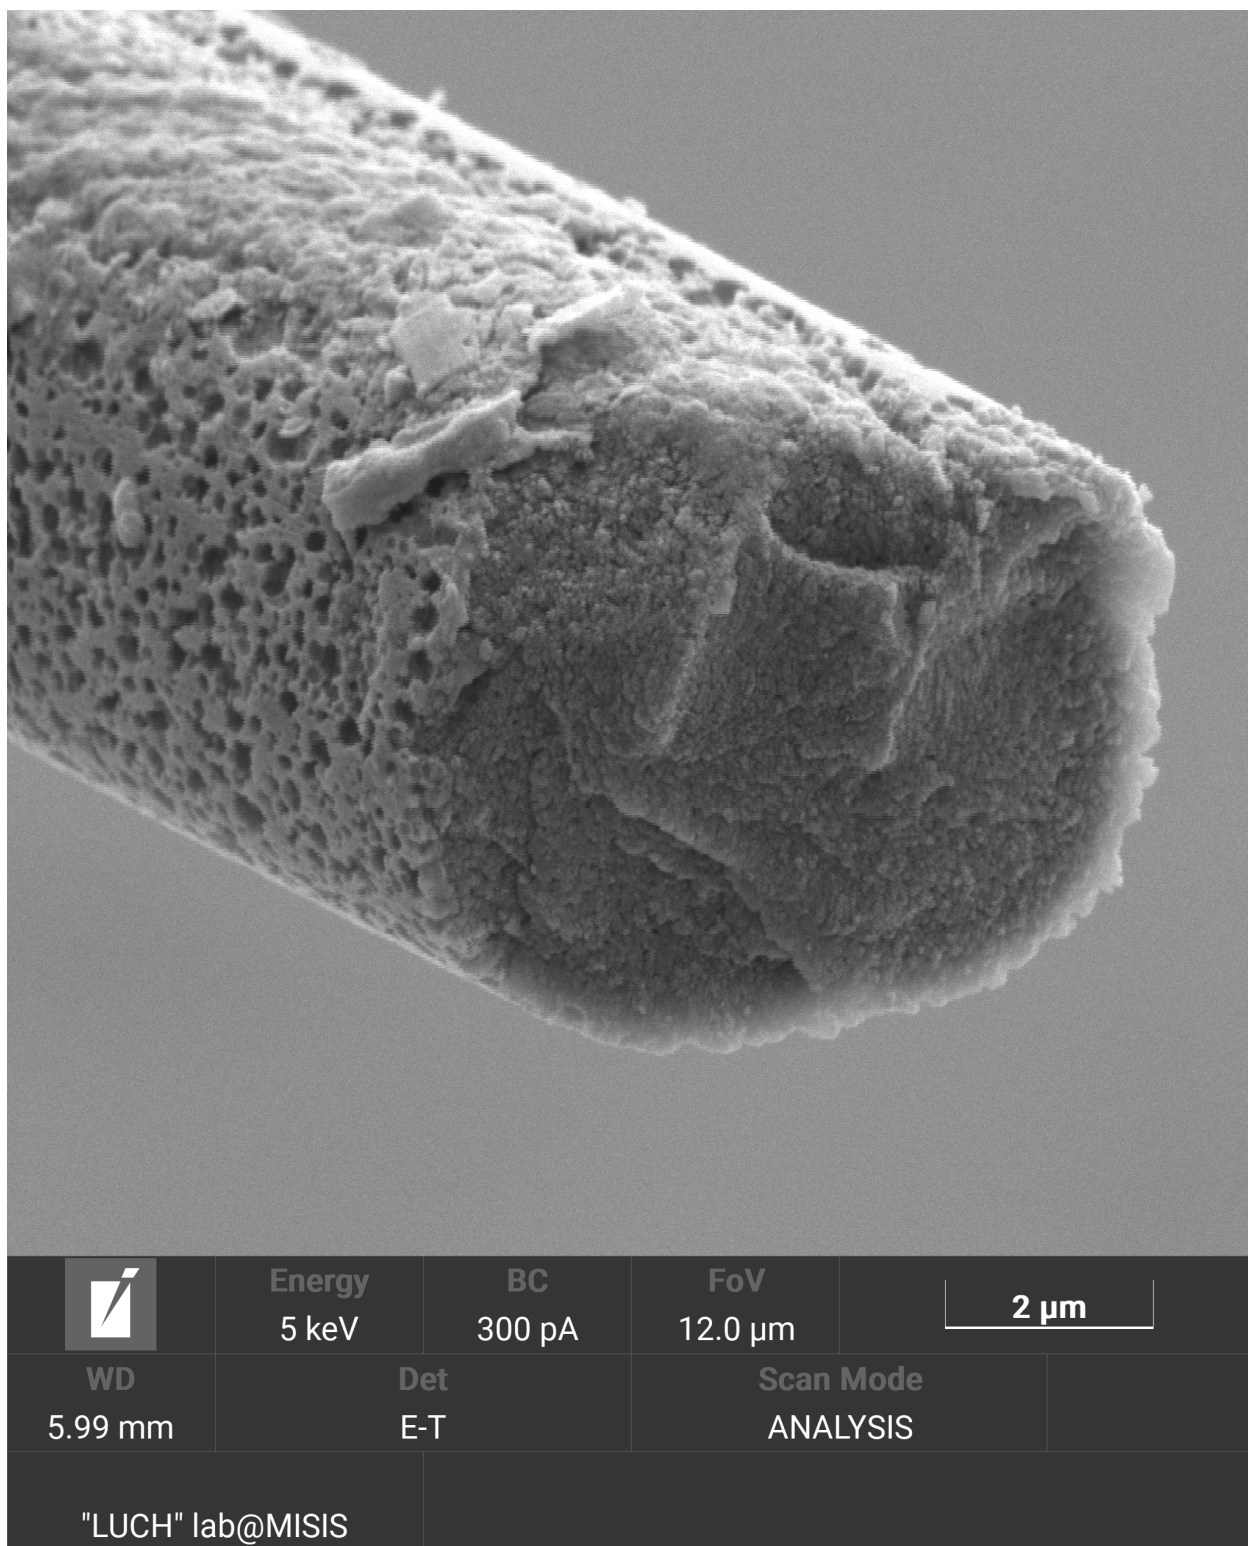

**Figure S6b.** Original, uncropped, and unadjusted image of BP-0.250 sample obtained by dual-beam scanning electron microscopy (Figure 2b in the main text).

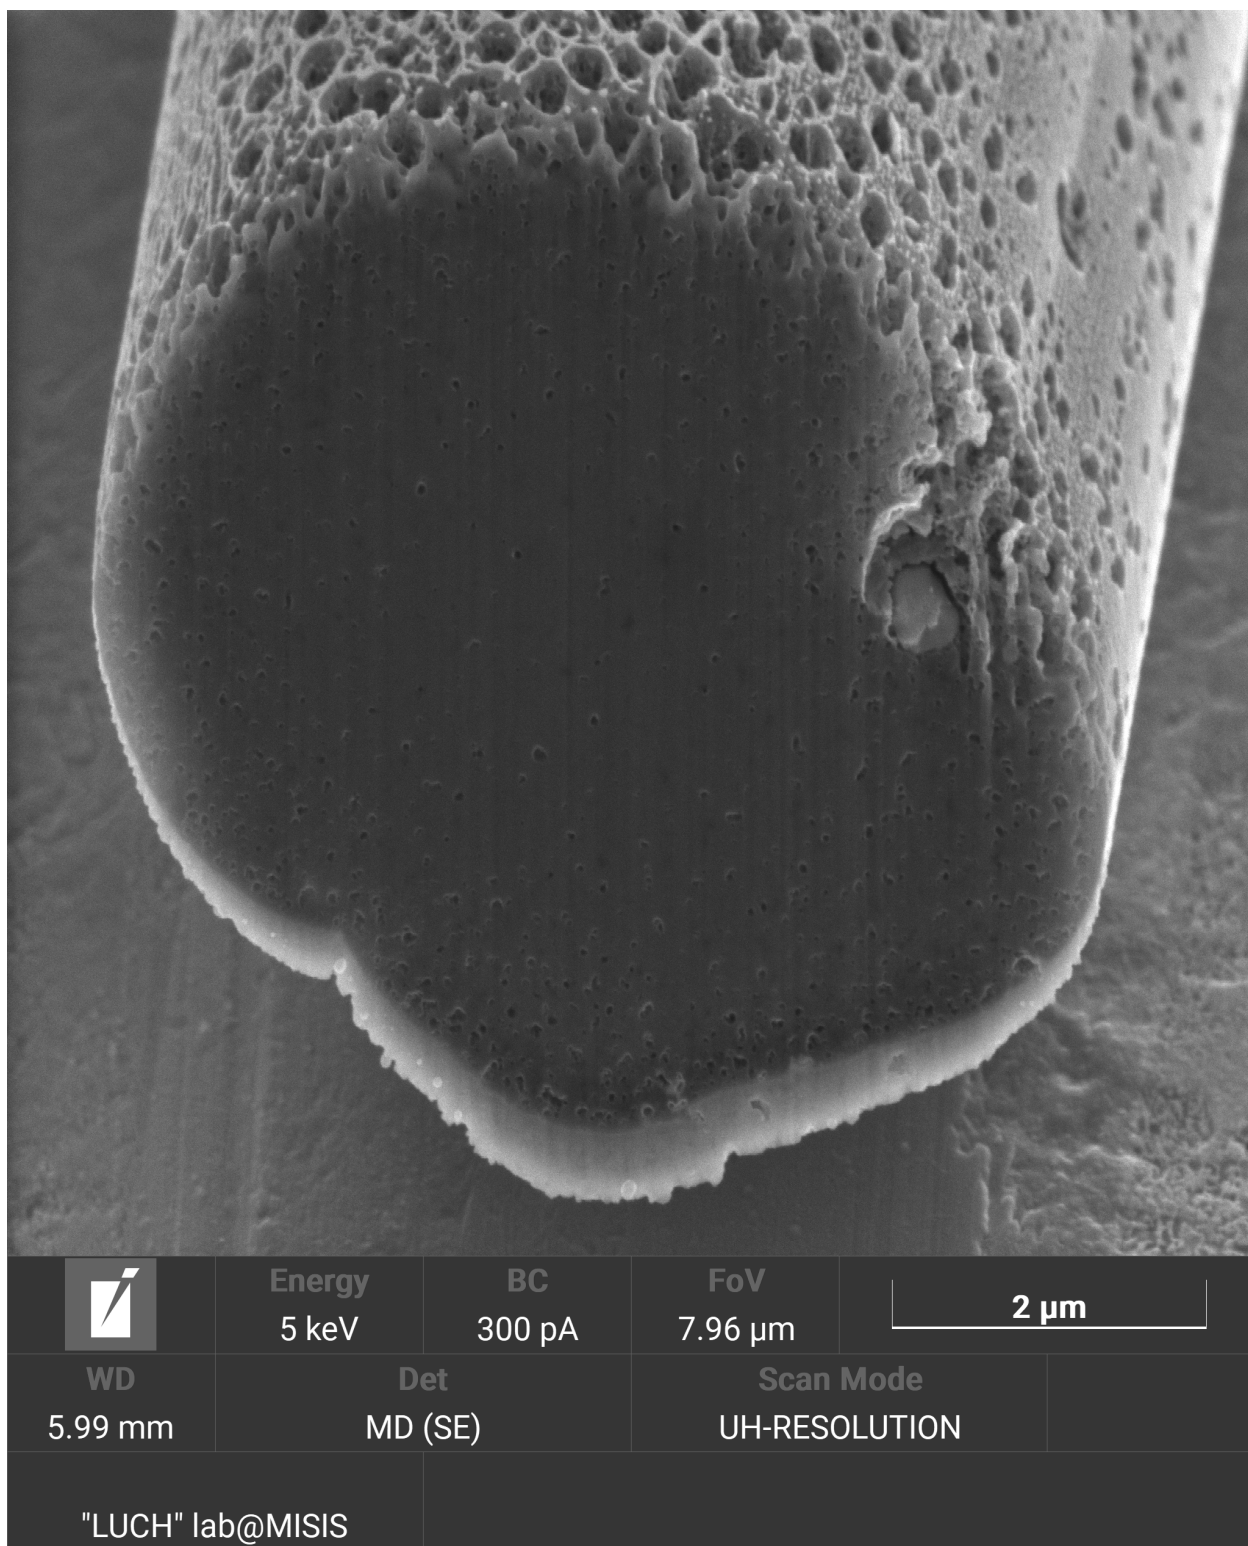

**Figure S7a.** Original, uncropped, and unadjusted image of BP-0 sample obtained by dual-beam scanning electron microscopy (Figure 3a in the main text).

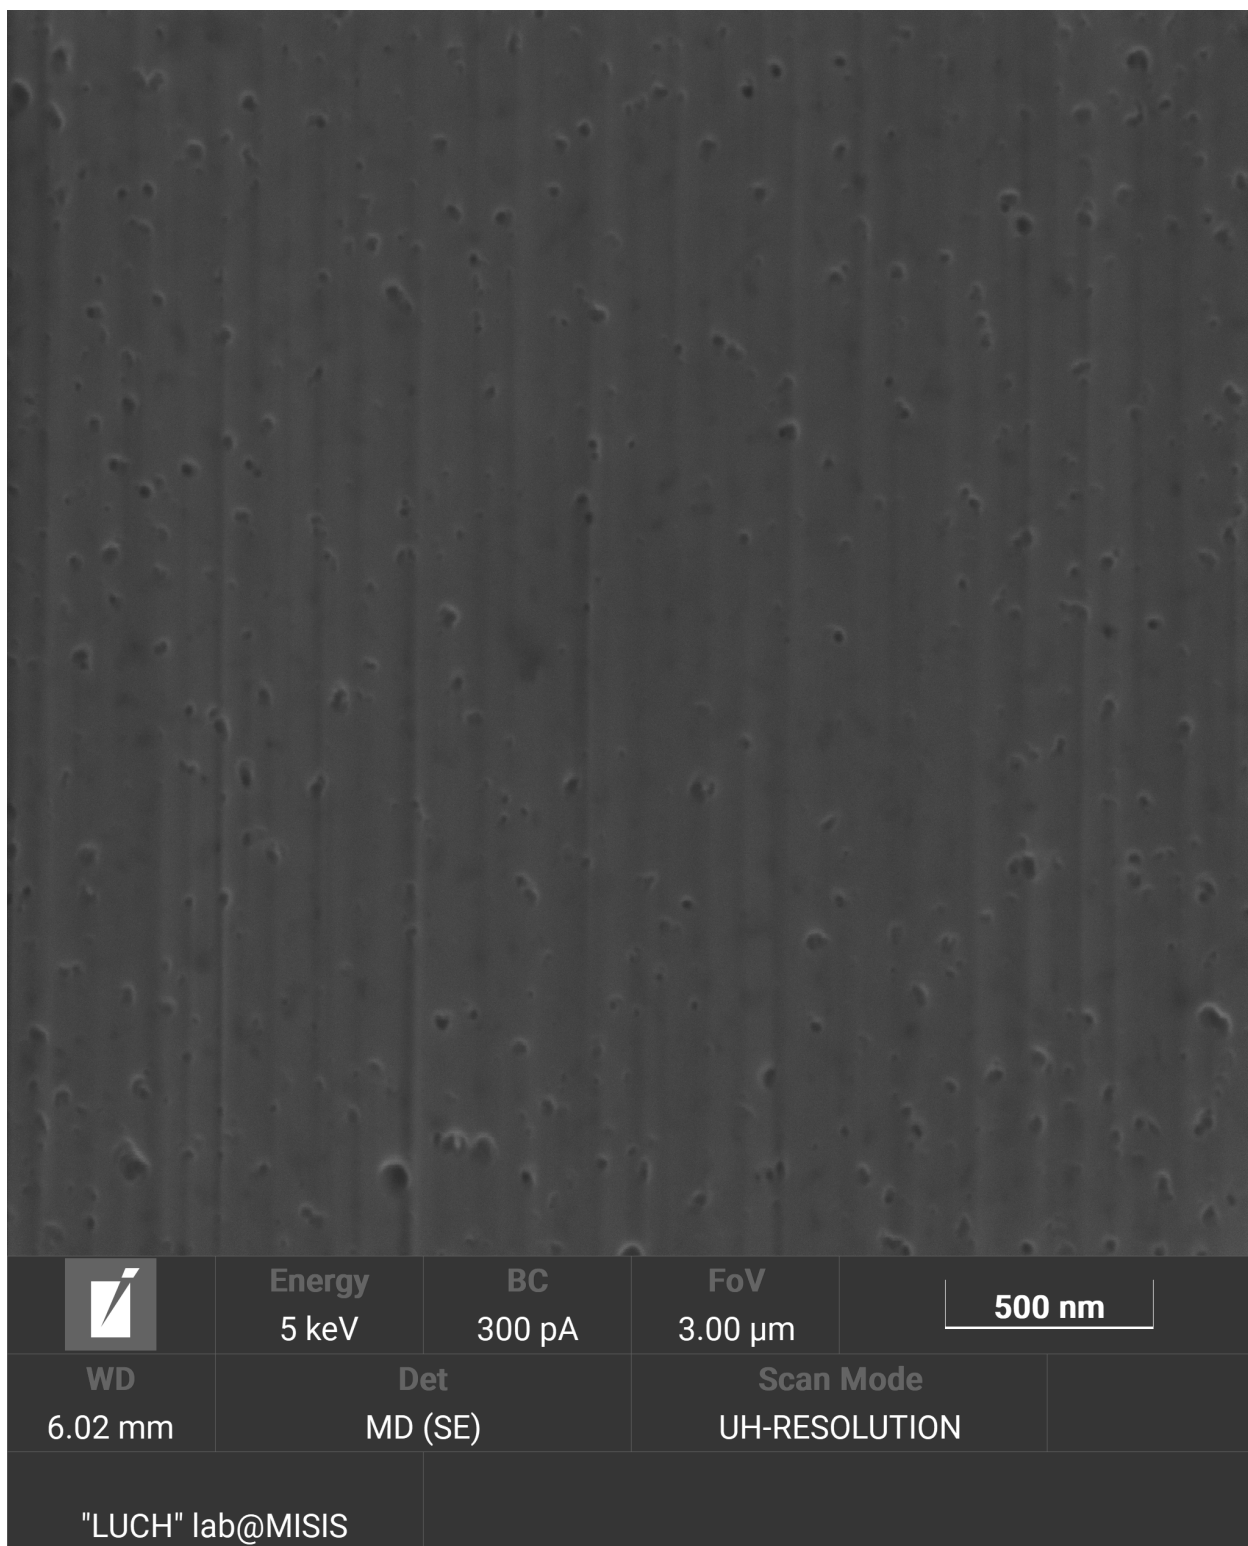

**Figure S7b.** Original, uncropped, and unadjusted image of BP-0 sample obtained by dual-beam scanning electron microscopy (Figure 3b in the main text).



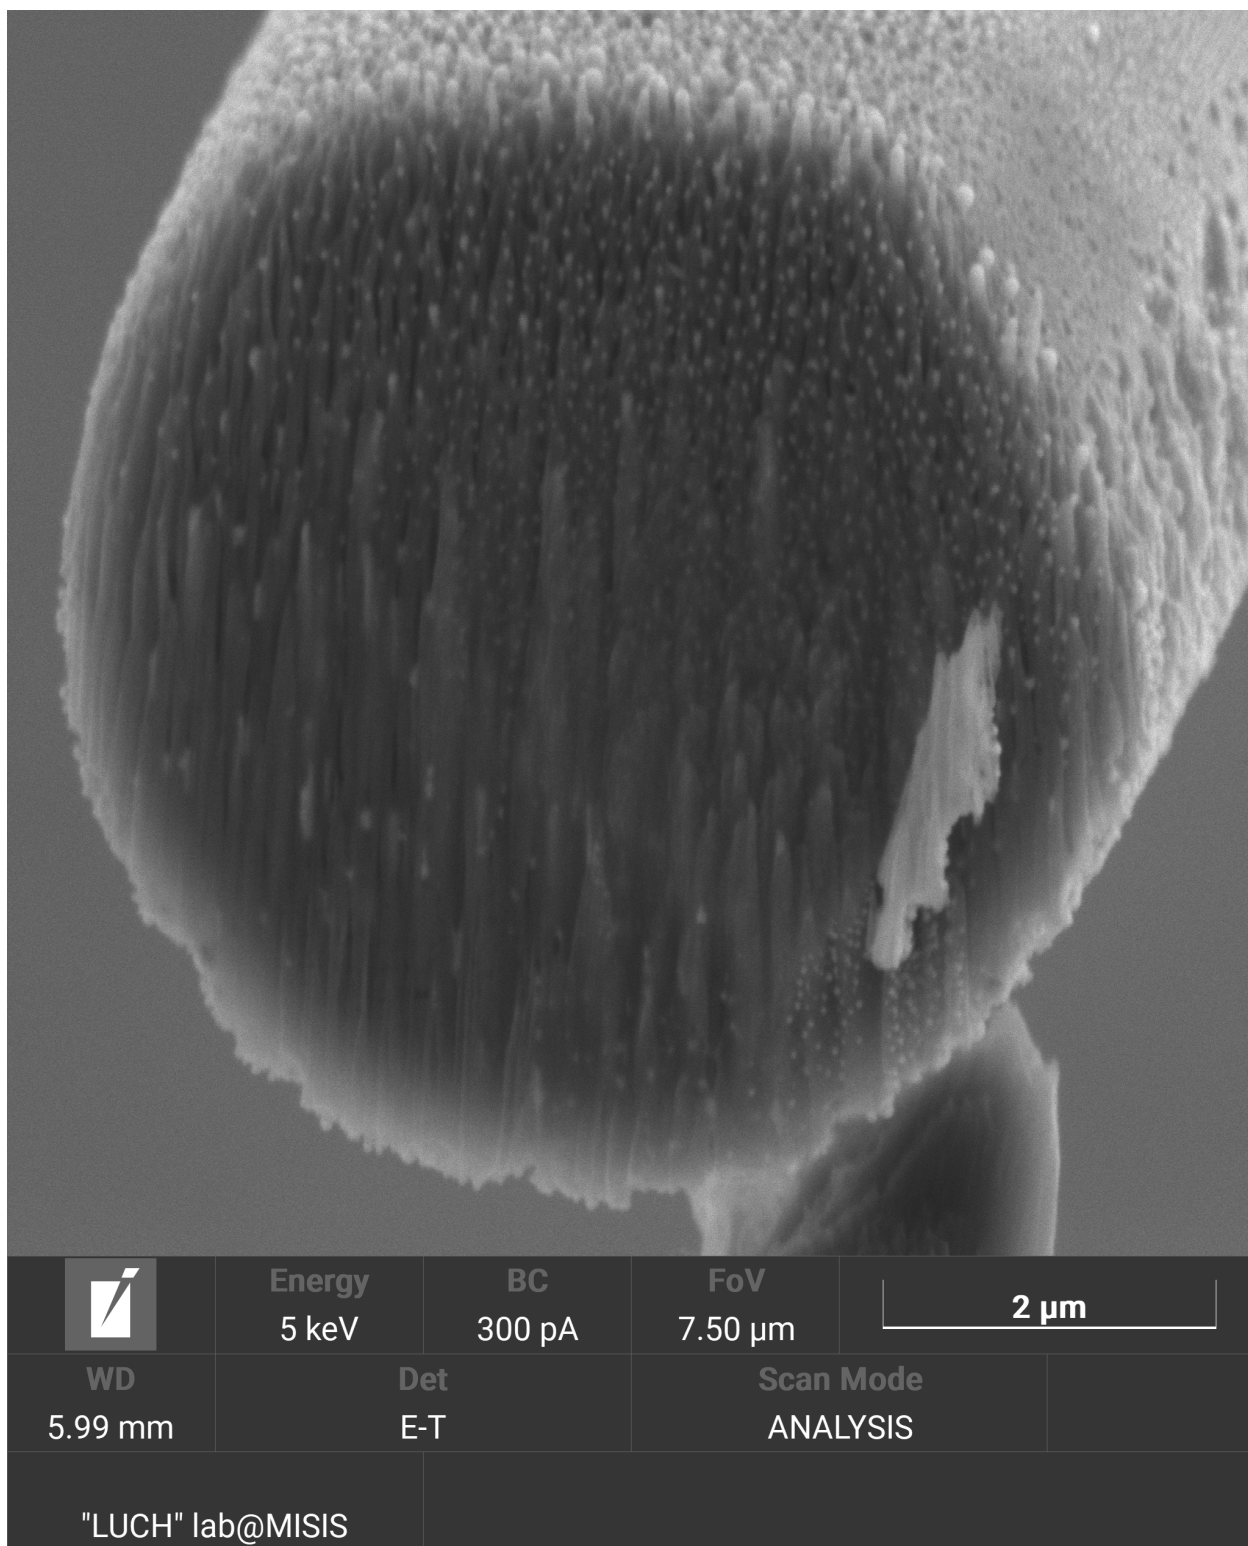

**Figure S7c.** Original, uncropped, and unadjusted image of BP-0.250 sample obtained by dual-beam scanning electron microscopy (Figure 3c in the main text).

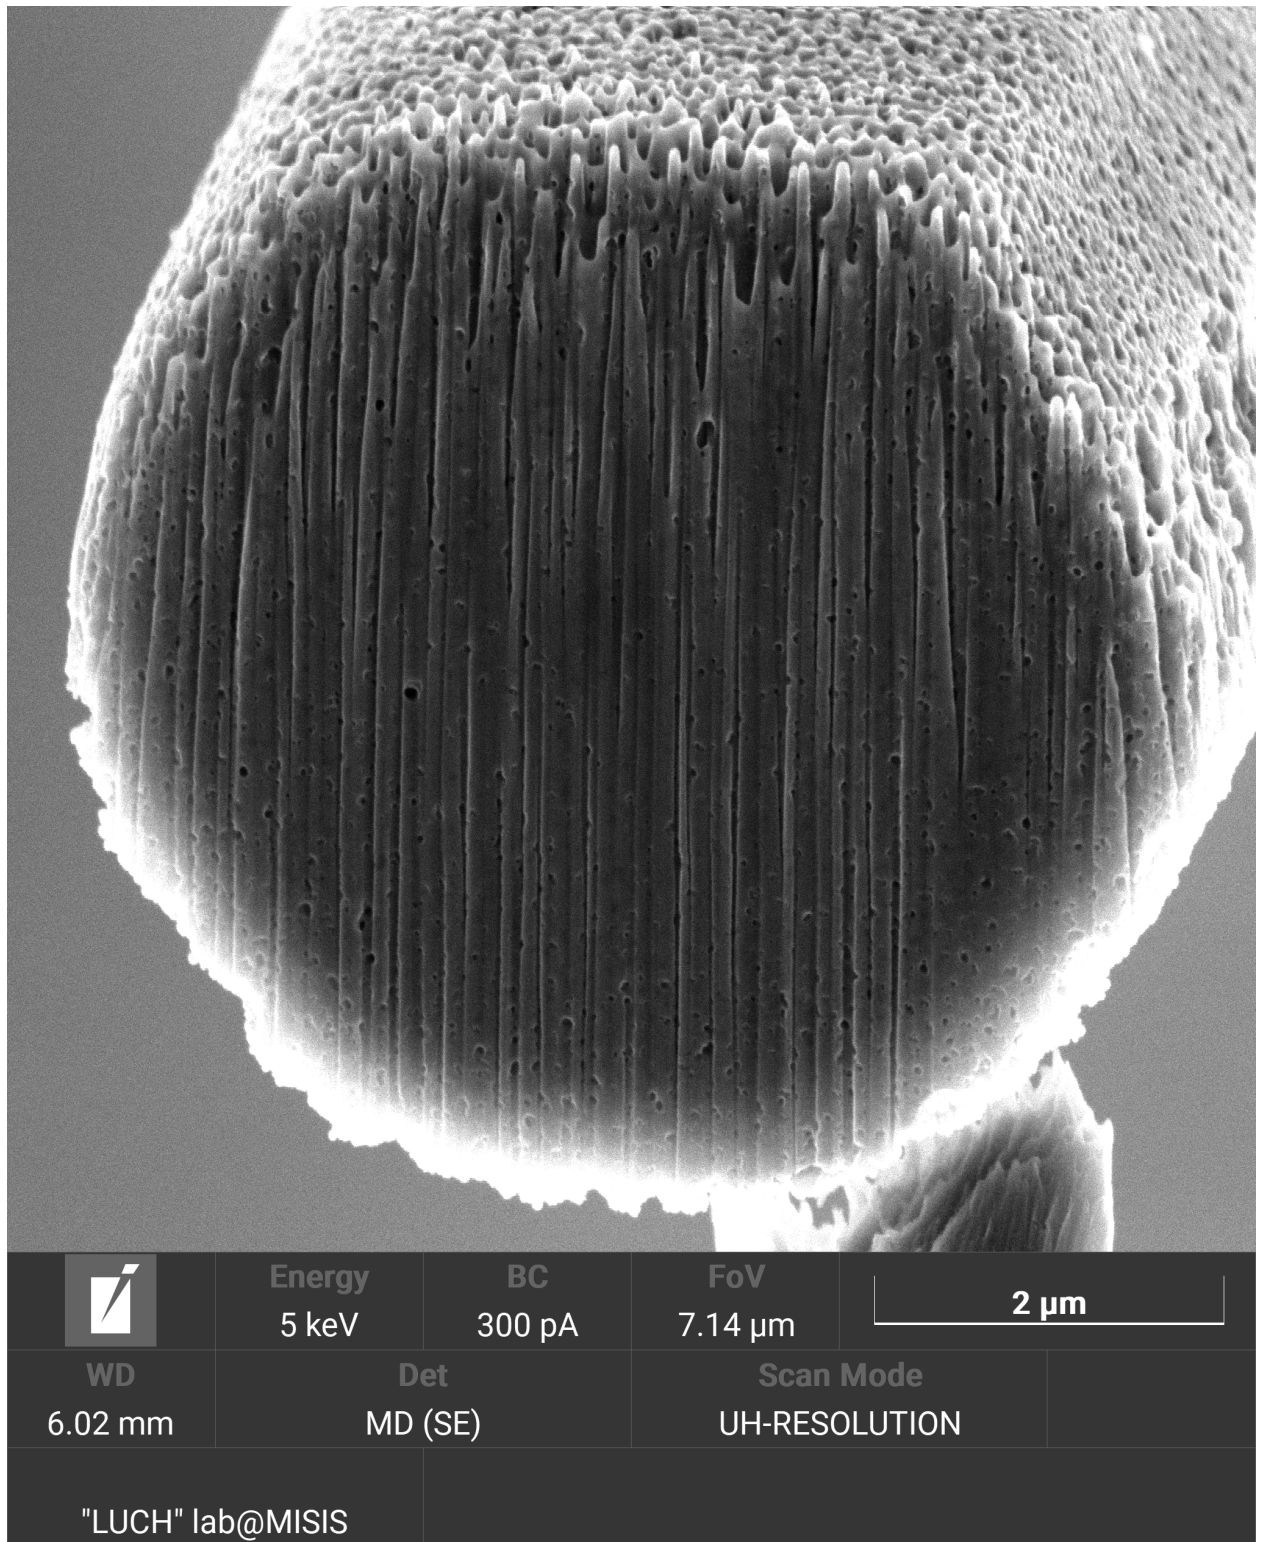

**Figure S7d.** Original, uncropped, and unadjusted image of BP-0.250 sample obtained by dual-beam scanning electron microscopy (Figure 3d in the main text).
